# Supplementary material
Source: Springer Nature journal article supplement (https://www.springermedizin.de/resource/supplementary/12916_2011_407_MOESM1_ESM.pdf/9599910)

**A**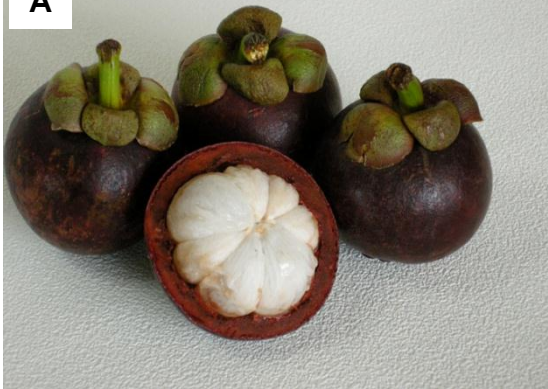**B**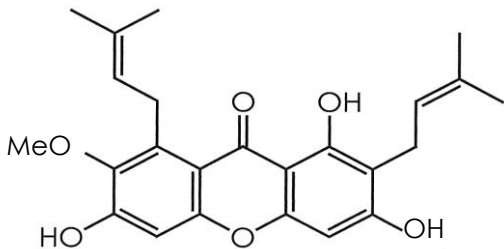

Supplement: MOESM1 [file 9599910]
